# Supplementary material
Source: Springer Nature journal article supplement (https://www.springermedizin.de/resource/supplementary/12958_2009_562_MOESM2_ESM.pdf/9568322)
Supplement: MOESM2 [file 9568322]

Table 2. Alignments of cysteines and disulfide bridges in GPB5 from various species

|           |                 | k | loop 1 |   |   | ring |   |   | loop 2 | k | loop 3 |   |     | ring |    | C-term |   |   |    |   |   |   |
|-----------|-----------------|---|--------|---|---|------|---|---|--------|---|--------|---|-----|------|----|--------|---|---|----|---|---|---|
|           |                 | 1 |        | I |   | 2    |   |   | 3      |   | 4      |   | III |      | 5  |        | 6 |   | IV |   | V |   |
| Chordata  | <i>human</i>    | C | 13     | C | 9 | C    | 1 | G | 1      | C | 19     | C | 14  | C    | 15 | C      | 1 | C | 2  | C | 6 | C |
|           | <i>bos</i>      | C | 13     | C | 9 | C    | 1 | G | 1      | C | 19     | C | 14  | C    | 15 | C      | 1 | C | 2  | C | 6 | C |
|           | <i>B florid</i> | C | 14     | C | 9 | C    | 1 | G | 1      | C | 19     | C | 14  | C    | 15 | C      | 1 | C | 2  | C | 6 | C |
| Ecdysozoa | <i>culex</i>    | C | 18     | C | 8 | C    | 1 | G | 1      | C | 19     | C | 14  | C    | 12 | C      | 1 | C | 2  | C | 6 | C |
|           | <i>anophel</i>  | C | 18     | C | 8 | C    | 1 | G | 1      | C | 19     | C | 14  | C    | 12 | C      | 1 | C | 2  | C | 6 | C |
|           | <i>aedes</i>    | C | 18     | C | 8 | C    | 1 | G | 1      | C | 19     | C | 14  | C    | 12 | C      | 1 | C | 2  | C | 6 | C |
|           | <i>droso</i>    | C | 18     | C | 8 | C    | 1 | G | 1      | C | 19     | C | 14  | C    | 12 | C      | 1 | C | 2  | C | 6 | C |
|           | <i>bombyx</i>   | C | 18     | C | 8 | C    | 1 | G | 1      | C | 19     | C | 14  | C    | 12 | C      | 1 | C | 2  | C | 6 | C |
| Loph      | <i>aplysia</i>  | C | 23     | C | 8 | C    | 1 | G | 1      | C | 19     | C | 14  | C    | 15 | C      | 1 | C | 2  | C | 6 | C |
|           | <i>capitela</i> | C | 22     | C | 8 | C    | 1 | G | 1      | C | 19     | C | 14  | C    | 12 | C      | 1 | C | 2  | C | 6 | C |
